# Supplementary material for: Biogenic Silver Nanoparticles/Mg-Al Layered Double Hydroxides with Peroxidase-like Activity for Mercury Detection and Antibacterial Activity
Source: MDPI journal article supplement (doi:10.3390/molecules28155754), 2023-07-30
Supplement: s1 [file s1]

## Supporting Information

# Biogenic Silver Nanoparticles/Mg-Al Layered Double Hydroxides with Peroxidase-like Activity for Mercury Detection and Antibacterial Activity

Masira I. Chamanmalik <sup>1</sup>, Arnet Maria Antony <sup>1</sup>, C. V. Yelamaggad <sup>2</sup>, Shivaputra A. Patil <sup>3,\*</sup>  
and Siddappa A. Patil <sup>1,\*</sup>

<sup>1</sup> Centre for Nano and Material Sciences, Jain Global Campus, Jain (Deemed-to-be University), Kanakapura, Bangalore 562112, India

<sup>2</sup> Centre for Nano and Soft Matter Sciences, Survey No. 7, Shivanapura, Bangalore 562162, India

<sup>3</sup> Pharmaceutical Sciences Department, College of Pharmacy, Rosalind Franklin University of Medicine and Science, 3333 Green Bay Road, North Chicago, IL 60064, USA

\* Correspondence: shivaputra.patil@rosalindfranklin.edu (S.A.P.);  
p.siddappa@jainuniversity.ac.in or patilsiddappa@gmail.com (S.A.P.)

## Table of contents

|                                                                                                                                                                      |   |
|----------------------------------------------------------------------------------------------------------------------------------------------------------------------|---|
| 1. GC-MS analysis of phytochemicals -----                                                                                                                            | 3 |
| 2. Qualitative analysis of phytochemicals -----                                                                                                                      | 4 |
| 3. Images of the test results of qualitative analysis of phytochemicals -----                                                                                        | 5 |
| 4. Relative activity (%) of the Mg-Al-OH@TGLE-AgNPs nanocatalyst with respect to<br>pH, catalyst loading, OPD and H <sub>2</sub> O <sub>2</sub> concentrations ----- | 5 |
| 5. References -----                                                                                                                                                  | 6 |

**Table S1.** GC-MS analysis of phytochemicals.

| Sl. No. | RT (min) | Area (%) | Compound                                                                                                                    |
|---------|----------|----------|-----------------------------------------------------------------------------------------------------------------------------|
| 1.      | 8.912    | 8.08     | 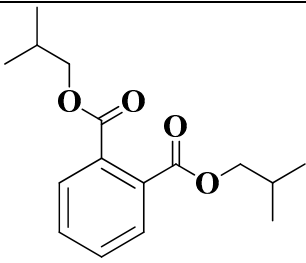 <p>Diisobutyl phthalate</p>               |
| 2.      | 8.857    | 23.56    |  <p>Dibutyl phthalate</p>                  |
| 3.      | 8.431    | 4.46     |  <p>1-Tricosene</p>                     |
| 4.      | 9.132    | 4.85     |  <p>Cyclohexyl pentan-2-yl phthalate</p> |
| 5.      | 9.180    | 5.36     |  <p>Dipentyl phthalate</p>               |

**Table S2.** Qualitative analysis of phytochemicals [2].

| Sl. No. | Test                                                                   | Observation                             | Inference                          |
|---------|------------------------------------------------------------------------|-----------------------------------------|------------------------------------|
| 1.      | <b>Test for saponins</b>                                               |                                         |                                    |
|         | Plant extract (aq.) shaken with water in the test tube                 | Development of stable foam              | Saponins are present               |
| 2.      | <b>Test for alkaloids</b>                                              |                                         |                                    |
|         | Plant extract + few drops of Mayer's reagent                           | Formation of precipitate                | Alkaloids are present              |
| 3.      | <b>Test for terpenoids</b>                                             |                                         |                                    |
|         | Plant extract + few Drops of conc. H <sub>2</sub> SO <sub>4</sub>      | Formation of the pale yellow layer down | Terpenoids are present             |
| 4.      | <b>Test for glycosides and sterols</b>                                 |                                         |                                    |
|         | Plant extract + 2 mL chloroform + Conc. H <sub>2</sub> SO <sub>4</sub> | Reddish brown interface formation       | Glycosides and sterols are present |
| 5.      | <b>Test for sugars</b>                                                 |                                         |                                    |
|         | Plant extract + 2ml distilled water + Molish's reagent                 | Purple violet ring in interference      | Sugars are present                 |

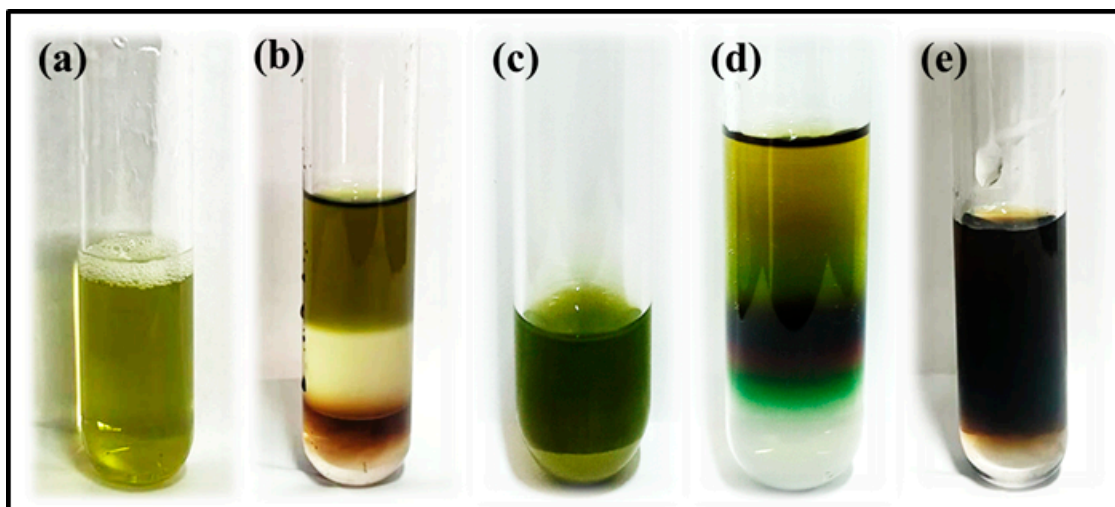

**Figure S1.** Images of the test results of qualitative analysis of phytochemicals [1].

**Table S3.** Relative activity (%) of the Mg-Al-OH@TGLE-AgNPs nanocatalyst with respect to pH, catalyst loading, OPD and H<sub>2</sub>O<sub>2</sub> concentrations [3].

| pH                                              | 3      | 4      | 5      | 6      | 7      | 8     |
|-------------------------------------------------|--------|--------|--------|--------|--------|-------|
| Relative activity (%)                           | 61.738 | 100    | 38.525 | 20.863 | 3.725  | 1.238 |
| Catalyst loading (wt% Ag)                       | 0      | 0.53   | 0.71   | 0.88   | 1.06   | 1.24  |
| Relative activity (%)                           | 1.638  | 38.488 | 73.863 | 79.475 | 96.175 | 100   |
| OPD concentration (mM)                          | 0      | 0.024  | 0.04   | 0.06   | 0.08   | 0.1   |
| Relative activity (%)                           | 4.075  | 40.063 | 48.925 | 61.063 | 64.938 | 100   |
| H <sub>2</sub> O <sub>2</sub> concentration (M) | 0      | 0.009  | 0.016  | 0.024  | 0.032  | 0.040 |
| Relative activity (%)                           | 1.825  | 68.788 | 78.113 | 81.188 | 85.200 | 100   |

## References

1. Vyas, P.; Yadav, D. K.; Khandelwal, P., *Tectona grandis* (teak)–A review on its phytochemical and therapeutic potential. *Nat. Prod. Res.* **2019**, 33, (16), 2338-2354.
2. Khatri, P.; Rana, J.; Jamdagni, P.; Sindhu, A., Phytochemical screening, GC-MS and FT-IR analysis of methanolic extract leaves of *Elettaria cardamomum*. *Int. J. Res.* **2017**, 5, (2), 213-224.
3. Antony, A. M.; Yelamaggad, C.; Patil, S. A., Palladium nanoparticles decorated on functionalized graphitic carbon nitride as an efficient and retrievable nanocatalyst for organic dye degradation and hydrogen peroxide sensing. *Mater. Chem. Phys.* **2023**, 297, 127370.
